# Supplementary material for: Atmospheric data set from the Geodetic Observatory Wettzell during the CONT-17 VLBI campaign
Source: Copernicus journal article supplement (doi:10.5194/essd-11-341-2019), 2019-02-28
Supplement: Supplementary file 1 [file essd-11-341-2019-supplement.zip]

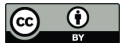

## *Supplement of*

# **Atmospheric data set from the Geodetic Observatory Wettzell during the CONT-17 VLBI campaign**

**Thomas Klügel et al.**

*Correspondence to:* Thomas Klügel ([thomas.kluegel@bkg.bund.de](mailto:thomas.kluegel@bkg.bund.de))

- [essd-11-341-2019-supplement-title-page.pdf](#)
- [hum\\_2017112808.png](#)
- [hum\\_2017112814.png](#)
- [hum\\_2017112908.png](#)
- [hum\\_2017112914.png](#)
- [hum\\_2017113008.png](#)
- [hum\\_2017113014.png](#)
- [hum\\_2017120108.png](#)
- [hum\\_2017120114.png](#)
- [hum\\_2017120208.png](#)
- [hum\\_2017120214.png](#)
- [hum\\_2017120308.png](#)
- [hum\\_2017120314.png](#)
- [hum\\_2017120408.png](#)
- [hum\\_2017120414.png](#)
- [hum\\_2017120508.png](#)
- [hum\\_2017120514.png](#)
- [hum\\_2017120608.png](#)
- [hum\\_2017120614.png](#)
- [hum\\_2017120708.png](#)

- hum\_2017120714.png
- hum\_2017120808.png
- hum\_2017120814.png
- hum\_2017120908.png
- hum\_2017120914.png
- hum\_2017121008.png
- hum\_2017121014.png
- hum\_2017121108.png
- hum\_2017121114.png
- hum\_2017121208.png
- hum\_2017121214.png
- hum\_2017121308.png
- hum\_2017121314.png
- hum\_2017121408.png
- hum\_2017121414.png
- hum\_2017121508.png
- hum\_2017121514.png
- pre\_2017112808.png
- pre\_2017112814.png
- pre\_2017112908.png
- pre\_2017112914.png
- pre\_2017113008.png
- pre\_2017113014.png
- pre\_2017120108.png
- pre\_2017120114.png
- pre\_2017120208.png
- pre\_2017120214.png
- pre\_2017120308.png
- pre\_2017120314.png
- pre\_2017120408.png
- pre\_2017120414.png
- pre\_2017120508.png
- pre\_2017120514.png

- pre\_2017120608.png
- pre\_2017120614.png
- pre\_2017120708.png
- pre\_2017120714.png
- pre\_2017120808.png
- pre\_2017120814.png
- pre\_2017120908.png
- pre\_2017120914.png
- pre\_2017121008.png
- pre\_2017121014.png
- pre\_2017121108.png
- pre\_2017121114.png
- pre\_2017121208.png
- pre\_2017121214.png
- pre\_2017121308.png
- pre\_2017121314.png
- pre\_2017121408.png
- pre\_2017121414.png
- pre\_2017121508.png
- pre\_2017121514.png
- tem\_2017112808.png
- tem\_2017112814.png
- tem\_2017112908.png
- tem\_2017112914.png
- tem\_2017113008.png
- tem\_2017113014.png
- tem\_2017120108.png
- tem\_2017120114.png
- tem\_2017120208.png
- tem\_2017120214.png
- tem\_2017120308.png
- tem\_2017120314.png
- tem\_2017120408.png

- tem\_2017120414.png
- tem\_2017120508.png
- tem\_2017120514.png
- tem\_2017120608.png
- tem\_2017120614.png
- tem\_2017120708.png
- tem\_2017120714.png
- tem\_2017120808.png
- tem\_2017120814.png
- tem\_2017120908.png
- tem\_2017120914.png
- tem\_2017121008.png
- tem\_2017121014.png
- tem\_2017121108.png
- tem\_2017121114.png
- tem\_2017121208.png
- tem\_2017121214.png
- tem\_2017121308.png
- tem\_2017121314.png
- tem\_2017121408.png
- tem\_2017121414.png
- tem\_2017121508.png
- tem\_2017121514.png

The copyright of individual parts of the supplement might differ from the CC BY 4.0 License.
